# Supplementary material for: Global variation in the prevalence of suicidal ideation, anxiety and their correlates among adolescents: A population based study of 82 countries
Source: PubMed Central journal article supplement — eClinicalMedicine. 2020 Jun 24;24:100395. doi: 10.1016/j.eclinm.2020.100395 (PMC7525128; doi:10.1016/j.eclinm.2020.100395), 2020-06-24
Supplement: mmc2.pdf [file mmc2.pdf]

**Supplementary table 1: Characteristics of the Global School-based Health Surveys by country**

| Country                        | Survey year | Sample size | Response rate |
|--------------------------------|-------------|-------------|---------------|
| Jordan                         | 2007        | 1876        | 99.8          |
| Algeria                        | 2011        | 4377        | 98.0          |
| Libya                          | 2007        | 2226        | 98.0          |
| China                          | 2003        | 10582       | 98.0          |
| Eswatini                       | 2013        | 3501        | 97.0          |
| Syrian                         | 2010        | 3,098       | 97.0          |
| VietNam                        | 2013        | 3200        | 96.0          |
| Myanmar                        | 2007        | 2438        | 95.0          |
| Botswana                       | 2005        | 1842        | 95.0          |
| Indonesia                      | 2007        | 10363       | 94.0          |
| Malawi                         | 2009        | 2172        | 94.0          |
| Oman                           | 2015        | 3327        | 92.0          |
| Bangladesh                     | 2014        | 2975        | 91.0          |
| United Arab Emirates           | 2010        | 2456        | 91.0          |
| British Virgin Islands         | 2009        | 1584        | 90.0          |
| Trinidad and Tobago            | 2011        | 2693        | 90.0          |
| Tuvalu                         | 2013        | 875         | 90.0          |
| Sri-lanka                      | 2008        | 2363        | 89.0          |
| Thailand                       | 2008        | 5230        | 89.0          |
| Namibia                        | 2013        | 4136        | 89.0          |
| Suriname                       | 2009        | 1619        | 89.0          |
| Malaysia                       | 2012        | 23992       | 89.0          |
| Iraq                           | 2012        | 1884        | 88.0          |
| Belize                         | 2011        | 1957        | 88.0          |
| Bolivia                        | 2012        | 3445        | 88.0          |
| El Salvador                    | 2009        | 1829        | 88.0          |
| Mongolia                       | 2010        | 5200        | 88.0          |
| Tanzania                       | 2014        | 3576        | 87.0          |
| Quarter                        | 2011        | 1838        | 87.0          |
| Egypt                          | 2011        | 2390        | 85.0          |
| Peru                           | 2010        | 2771        | 85.0          |
| Cambodia                       | 2013        | 3669        | 85.0          |
| Kiribati                       | 2012        | 1438        | 85.0          |
| Solomon Islands                | 2011        | 1278        | 85.0          |
| Kenya                          | 2003        | 2890        | 84.0          |
| Anguilla                       | 2009        | 887         | 84.0          |
| Dominica                       | 2009        | 1544        | 84.0          |
| St. Vincent and the Grenadines | 2007        | 1176        | 84.0          |
| Djibouti                       | 2011        | 1359        | 83.0          |
| Tunisia                        | 2008        | 2465        | 83.0          |
| Curaçao                        | 2009        | 2689        | 83.0          |
| Mauritius                      | 2011        | 2084        | 82.0          |
| Seychelles                     | 2015        | 2335        | 82.0          |
| Guatemala                      | 2015        | 4082        | 82.0          |
| Saint Lucia                    | 2007        | 1219        | 82.0          |
| Wallis and Futuna              | 2015        | 1024        | 82.0          |
| Niue                           | 2010        | 131         | 81.0          |
| Mozambique                     | 2015        | 1737        | 80.0          |
| Tonga                          | 2013        | 2015        | 80.0          |
| Timor                          | 2015        | 3217        | 79.0          |
| Afghanistan                    | 2014        | 2358        | 79.0          |
| Cayman Islands                 | 2007        | 1201        | 79.0          |
| Honduras                       | 2012        | 1700        | 79.0          |
| Philippines                    | 2015        | 8394        | 79.0          |
| Samoa                          | 2011        | 2030        | 79.0          |
| Bahamas                        | 2013        | 1270        | 78.0          |
| Grenada                        | 2013        | 1366        | 78.0          |
| Montserrat                     | 2008        | 203         | 78.0          |
| Ghana                          | 2007        | 1839        | 76.0          |
| Pakistan                       | 2009        | 4676        | 76.0          |
| Guyana                         | 2010        | 2212        | 76.0          |

---

|                                  |      |       |      |
|----------------------------------|------|-------|------|
| Yemen                            | 2014 | 2476  | 75-0 |
| Barbados                         | 2011 | 1573  | 73-0 |
| Nauru                            | 2011 | 499   | 73-0 |
| Costa Rica                       | 2009 | 2590  | 72-0 |
| Jamaica                          | 2010 | 1482  | 72-0 |
| Vanuatu                          | 2011 | 1018  | 72-0 |
| Argentina                        | 2012 | 26988 | 71-0 |
| Uruguay                          | 2006 | 3415  | 71-0 |
| Tokelau                          | 2014 | 132   | 71-0 |
| Mauritania                       | 2010 | 1898  | 70-0 |
| Zambia                           | 2004 | 1,641 | 70-0 |
| Saint Kitts and Nevis            | 2011 | 1652  | 70-0 |
| Lao People's Democratic Republic | 2015 | 3442  | 70-0 |
| Uganda                           | 2003 | 2869  | 69-0 |
| Antigua                          | 2009 | 1208  | 67-0 |
| Brunei Darussalam                | 2014 | 2514  | 65-0 |
| Cook Islands                     | 2015 | 669   | 65-0 |
| Maldives                         | 2009 | 3325  | 60-0 |
| Chile                            | 2013 | 2001  | 60-0 |
| Kuwait                           | 2015 | 3304  | 78-0 |
| Morocco                          | 2010 | 2864  | 92-0 |

---

**Supplementary table -2- Prevalence of suicidal ideation and anxiety among the young adolescent in selected counties those had different time points data**

| Country             | Suicidal ideation |            |      |            | Anxiety |            |      |            |
|---------------------|-------------------|------------|------|------------|---------|------------|------|------------|
|                     | Year              | Prevalence | Year | Prevalence | Year    | Prevalence | Year | Prevalence |
| Namibia             | 2004              | 32.17      | 2013 | 26.4       | 2004    | 19.79      | 2013 | 14.41      |
| Seychelles          | 2007              | 17.44      | 2015 | 21.76      | 2007    | 11.18      | 2015 | 11.31      |
| Argentina           | 2007              | 16.97      | 2012 | 16.5       | 2007    | 10.45      | 2012 | 9.33       |
| Guyana              | 2004              | 18.67      | 2010 | 23.48      | 2004    | 13.11      | 2010 | 14.37      |
| Trinidad and Tobago | 2007              | 17.89      | 2011 | 17.07      | 2007    | 11.14      | 2011 | 7.39       |
| Indonesia           | 2007              | 4.74       | 2015 | 5.5        | 2006    | 5.76       | 2012 | 5.53       |
| Thailand            | 2008              | 8.62       | 2015 | 12.88      | 2007    | 7.84 I     | 2015 | 4.64       |
| Jordan              | 2004              | 15.46      | 2007 | 17.82      | 2008    | 6.75       | 2015 | 9.15       |
| Kuwait              | 2011              | 19.58      | 2015 | 17.17      | 2004    | 19.16      | 2007 | 17.64      |
| Morocco             | 2006              | 14.42      | 2010 | 15.01      | 2011    | 20.85      | 2015 | 21.19      |

**Supplementary table -3- Factors associated with Suicidal ideation among the young adolescent, per WHO region**

| Variables                                                                      | Asia             |          |  | Africa           |          |  | Eastern Mediterranean Region |          | Region of Americas |          | Western Pacific Region |          | European Region  |          |
|--------------------------------------------------------------------------------|------------------|----------|--|------------------|----------|--|------------------------------|----------|--------------------|----------|------------------------|----------|------------------|----------|
|                                                                                | OR (95% CI)      | p- value |  | OR (95% CI)      | p- value |  | OR (95% CI)                  | p- value | OR (95% CI)        | p- value | OR (95% CI)            | p- value | OR (95% CI)      | p- value |
| <b>Sex</b>                                                                     |                  |          |  |                  |          |  |                              |          |                    |          |                        |          |                  |          |
| Boys                                                                           | <b>Ref</b>       |          |  | <b>Ref</b>       |          |  | <b>Ref</b>                   |          | <b>Ref</b>         |          | <b>Ref</b>             |          | <b>Ref</b>       |          |
| Girls                                                                          | 1.75 (1.47-2.09) | <0.001   |  | 1.01 (0.79-1.27) | 0.958    |  | 1.26 (1.03-1.53)             | 0.023    | 2.30 (2.09-2.52)   | <0.001   | 1.82 (1.54-2.15)       | <0.001   | 2.21 (1.44-3.39) | <0.001   |
| <b>Age</b>                                                                     |                  |          |  |                  |          |  |                              |          |                    |          |                        |          |                  |          |
| 12-13 years                                                                    | <b>Ref</b>       |          |  | <b>Ref</b>       |          |  | <b>Ref</b>                   |          | <b>Ref</b>         |          | <b>Ref</b>             |          | <b>Ref</b>       |          |
| 14-15 years                                                                    | 1.46 (1.19-1.8)  | <0.001   |  | 0.73 (0.54-0.99) | 0.041    |  | 1.17 (0.95-1.44)             | 0.142    | 1.09 (0.92-1.28)   | 0.335    | 1.17 (0.9-1.5)         | 0.238    | 2.53 (1.31-4.91) | 0.006    |
| 16-17 years                                                                    | 1.90 (1.48-2.44) | <0.001   |  | 0.81 (0.6-1.09)  | 0.167    |  | 1.59 (1.21-2.08)             | <0.001   | 1.2 (1.02-1.42)    | 0.025    | 1.47 (1.1-1.97)        | <0.001   | 3.23 (1.7-6.14)  | <0.001   |
| <b>Socioeconomic status</b>                                                    |                  |          |  |                  |          |  |                              |          |                    |          |                        |          |                  |          |
| Average                                                                        | <b>Ref</b>       |          |  | <b>Ref</b>       |          |  | <b>Ref</b>                   |          | <b>Ref</b>         |          | <b>Ref</b>             |          | <b>Ref</b>       |          |
| Below average                                                                  | 1.15 (0.96-1.38) | 0.128    |  | 1.18 (0.96-1.45) | 0.124    |  | 1.05 (0.89-1.24)             | 0.543    | 1.03 (0.92-1.15)   | 0.622    | 1.18 (1.02-1.37)       | 0.029    | 1.65 (0.87-3.13) | 0.125    |
| <b>Close friends</b>                                                           |                  |          |  |                  |          |  |                              |          |                    |          |                        |          |                  |          |
| No                                                                             | 2.16 (1.57-2.96) | <0.001   |  | 2.18 (1.7-2.8)   | <0.001   |  | 2.2 (1.73-2.78)              | <0.001   | 1.45 (1.19-1.77)   | <0.001   | 2.41 (1.81-3.23)       | <0.001   | 3.01 (1.17-7.77) | 0.022    |
| Yes                                                                            | <b>Ref</b>       |          |  | <b>Ref</b>       |          |  | <b>Ref</b>                   |          | <b>Ref</b>         |          | <b>Ref</b>             |          | <b>Ref</b>       |          |
| <b>Peer were supportive</b>                                                    |                  |          |  |                  |          |  |                              |          |                    |          |                        |          |                  |          |
| Never/rarely                                                                   | <b>Ref</b>       |          |  | <b>Ref</b>       |          |  | <b>Ref</b>                   |          | <b>Ref</b>         |          | <b>Ref</b>             |          | <b>Ref</b>       |          |
| Sometimes                                                                      | 0.57 (0.44-0.73) | <0.001   |  | 0.84 (0.67-1.04) | 0.117    |  | 0.89 (0.71-1.12)             | 0.311    | 0.9 (0.78-1.03)    | 0.135    | 0.86 (0.74-1.01)       | 0.064    | 1.91 (1.19-3.06) | 0.007    |
| Most of the times                                                              | 0.67 (0.51-0.88) | 0.004    |  | 0.85 (0.67-1.08) | 0.182    |  | 0.77 (0.62-0.96)             | 0.019    | 0.94 (0.84-1.05)   | 0.286    | 0.79 (0.62-1)          | 0.046    | 1.64 (0.91-2.96) | 0.099    |
| Always                                                                         | 0.60 (0.46-0.78) | <0.001   |  | 0.90 (0.65-1.25) | 0.536    |  | 0.71 (0.53-0.94)             | 0.016    | 0.88 (0.75-1.03)   | 0.112    | 0.88 (0.7-1.11)        | 0.288    | 2.13 (1.14-3.98) | 0.017    |
| <b>Parental understanding (Parents or guardians understood problem)</b>        |                  |          |  |                  |          |  |                              |          |                    |          |                        |          |                  |          |
| Never/rarely                                                                   | <b>Ref</b>       |          |  | <b>Ref</b>       |          |  | <b>Ref</b>                   |          | <b>Ref</b>         |          | <b>Ref</b>             |          | <b>Ref</b>       |          |
| Sometimes                                                                      | 0.72 (0.56-0.93) | 0.013    |  | 0.92 (0.67-1.27) | 0.606    |  | 1.12 (0.84-1.5)              | 0.422    | 0.75 (0.66-0.86)   | <0.001   | 0.76 (0.63-0.92)       | 0.004    | 0.76 (0.4-1.42)  | 0.386    |
| Most of the times                                                              | 0.61 (0.44-0.84) | 0.003    |  | 0.90 (0.69-1.19) | 0.464    |  | 0.89 (0.64-1.23)             | 0.479    | 0.57 (0.49-0.66)   | <0.001   | 0.54 (0.42-0.69)       | <0.001   | 0.69 (0.34-1.38) | 0.290    |
| Always                                                                         | 0.67 (0.5-0.9)   | 0.009    |  | 0.80 (0.55-1.15) | 0.219    |  | 0.83 (0.67-1.03)             | 0.096    | 0.57 (0.5-0.66)    | <0.001   | 0.72 (0.57-0.9)        | 0.005    | 0.42 (0.23-0.79) | 0.006    |
| <b>Parental monitoring (Parents or guardians didn't know about free time )</b> |                  |          |  |                  |          |  |                              |          |                    |          |                        |          |                  |          |
| Never/rarely                                                                   | <b>Ref</b>       |          |  | <b>Ref</b>       |          |  | <b>Ref</b>                   |          | <b>Ref</b>         |          | <b>Ref</b>             |          | <b>Ref</b>       |          |
| Sometimes                                                                      | 0.89 (0.7-1.13)  | 0.336    |  | 0.70 (0.54-0.91) | 0.008    |  | 0.81 (0.67-0.98)             | 0.034    | 0.91 (0.77-1.08)   | 0.285    | 0.74 (0.63-0.87)       | <0.001   | 0.49 (0.33-0.73) | <0.001   |

|                                                                          |                 |        |        |                 |        |       |                  |        |                 |        |        |                  |        |                 |        |        |
|--------------------------------------------------------------------------|-----------------|--------|--------|-----------------|--------|-------|------------------|--------|-----------------|--------|--------|------------------|--------|-----------------|--------|--------|
| Most of the times                                                        | 0.93<br>1.31)   | (0.67- | 0.693  | 0.83<br>1.12)   | (0.61- | 0.213 | 0.66 (0.48-0.9)  | 0.009  | 0.71<br>0.82)   | (0.62- | <0.001 | 0.53 (0.42-0.67) | <0.001 | 0.28<br>0.53)   | (0.15- | <0.001 |
| Always                                                                   | 0.71<br>0.94)   | (0.54- | 0.015  | 0.84<br>1.23)   | (0.57- | 0.363 | 0.76 (0.6-0.95)  | 0.018  | 0.73<br>0.83)   | (0.63- | <0.001 | 0.64 (0.52-0.78) | <0.001 | 0.35 (0.2-0.61) |        | <0.001 |
| <b>Parental control (Parents went through things without permission)</b> |                 |        |        |                 |        |       |                  |        |                 |        |        |                  |        |                 |        |        |
| Never/rarely                                                             | <b>Ref</b>      |        |        | <b>Ref</b>      |        |       | <b>Ref</b>       |        | <b>Ref</b>      |        |        | <b>Ref</b>       |        | <b>Ref</b>      |        |        |
| Sometimes                                                                | 1.13<br>1.33)   | (0.96- | 0.142  | 0.98 (0.74-1.3) |        | 0.887 | 1.38 (1.08-1.76) | 0.009  | 1.15<br>1.31)   | (1.02- | 0.025  | 1.42 (1.18-1.71) | <0.001 | NA              |        | NA     |
| Most of the times                                                        | 1.45<br>2.21)   | (0.95- | 0.085  | 1.10<br>1.55)   | (0.78- | 0.581 | 1.24 (0.88-1.75) | 0.222  | 1.54<br>1.87)   | (1.26- | <0.001 | 1.88 (1.45-2.43) | <0.001 | NA              |        | NA     |
| Always                                                                   | 1.32<br>1.77)   | (0.99- | 0.057  | 1.45<br>2.27)   | (0.92- | 0.106 | 1.49 (1.12-1.98) | 0.006  | 1.68 (1.41-2)   |        | <0.001 | 1.9 (1.41-2.57)  | <0.001 | NA              |        | NA     |
| <b>Peer conflict</b>                                                     |                 |        |        |                 |        |       |                  |        |                 |        |        |                  |        |                 |        |        |
| Yes                                                                      | 1.32<br>1.61)   | (1.09- | 0.005  | 1.13<br>1.47)   | (0.87- | 0.368 | 1.09 (0.89-1.34) | 0.422  | 1.53<br>1.67)   | (1.39- | <0.001 | 1.41 (1.23-1.62) | <0.001 | NA              |        | NA     |
| No                                                                       | <b>Ref</b>      |        |        | <b>Ref</b>      |        |       | <b>Ref</b>       |        | <b>Ref</b>      |        |        | <b>Ref</b>       |        | <b>Ref</b>      |        |        |
| <b>Peer victimization</b>                                                |                 |        |        |                 |        |       |                  |        |                 |        |        |                  |        |                 |        |        |
| Yes                                                                      | 1.27 (1.07-1.5) |        | 0.005  | 1.17<br>1.37)   | (0.99- | 0.062 | 1.30 (1.06-1.58) | <0.001 | 1.65 (1.5-1.83) |        | <0.001 | 1.29 (1.09-1.53) | 0.003  | 1.84<br>2.95)   | (1.14- | 0.012  |
| No                                                                       | <b>Ref</b>      |        |        | <b>Ref</b>      |        |       | <b>Ref</b>       |        | <b>Ref</b>      |        |        | <b>Ref</b>       |        | <b>Ref</b>      |        |        |
| <b>Peer isolation</b>                                                    |                 |        |        |                 |        |       |                  |        |                 |        |        |                  |        |                 |        |        |
| Yes                                                                      | 2.32 (1.79-3)   |        | <0.001 | 1.29<br>1.61)   | (1.04- | 0.023 | 1.47 (1.27-1.7)  | <0.001 | 1.66<br>1.86)   | (1.49- | <0.001 | 1.39 (1.17-1.66) | <0.001 | 2.87<br>4.54)   | (1.81- | <0.001 |
| No                                                                       | <b>Ref</b>      |        |        | <b>Ref</b>      |        |       | <b>Ref</b>       |        | <b>Ref</b>      |        |        | <b>Ref</b>       |        | <b>Ref</b>      |        |        |
| <b>loneliness</b>                                                        |                 |        |        |                 |        |       |                  |        |                 |        |        |                  |        |                 |        |        |
| Yes                                                                      | 2.53<br>3.34)   | (1.91- | <0.001 | 1.49 (1.05-2.1) |        | 0.024 | 2.08 (1.72-2.52) | <0.001 | 3.37<br>3.81)   | (2.98- | <0.001 | 2.7 (2.25-3.24)  | <0.001 | 3.21 (1.64-6.3) |        | <0.001 |
| No                                                                       | <b>Ref</b>      |        |        |                 |        |       |                  |        |                 |        |        |                  |        |                 |        |        |

**Supplementary table -4: Factors associated with Anxiety among the young adolescent, per WHO region**

| Variables                                                                      | Asia             |          | Africa           |          | Eastern Mediterranean Region |          | Region of Americas |          | Weastern Pacific Region |          | European Region  |          |
|--------------------------------------------------------------------------------|------------------|----------|------------------|----------|------------------------------|----------|--------------------|----------|-------------------------|----------|------------------|----------|
|                                                                                | OR (95% CI)      | p- value | OR (95% CI)      | p- value | OR (95% CI)                  | p- value | OR (95% CI)        | p- value | OR (95% CI)             | p- value | OR (95% CI)      | p- value |
| <b>Sex</b>                                                                     |                  |          |                  |          |                              |          |                    |          |                         |          |                  |          |
| Boys                                                                           | <b>Ref</b>       |          | <b>Ref</b>       |          | <b>Ref</b>                   |          | <b>Ref</b>         |          | <b>Ref</b>              |          | <b>Ref</b>       |          |
| Girls                                                                          | 1.37 (1.12-1.68) | 0.002    | 1.11 (0.84-1.47) | 0.462    | 2.10 (1.73-2.54)             | <0.001   | 1.92 (1.69-2.17)   | <0.001   | 1.38 (1.13-1.69)        | 0.002    | 2.99 (1.76-5.09) | <0.001   |
| <b>Age</b>                                                                     |                  |          |                  |          |                              |          |                    |          |                         |          |                  |          |
| 12-13 years                                                                    | <b>Ref</b>       |          | <b>Ref</b>       |          | <b>Ref</b>                   |          | <b>Ref</b>         |          | <b>Ref</b>              |          | <b>Ref</b>       |          |
| 14-15 years                                                                    | 1.16 (0.92-1.45) | 0.207    | 1.01 (0.72-1.42) | 0.941    | 1.23 (1.05-1.45)             | 0.012    | 1.23 (1.02-1.49)   | 0.029    | 1.22 (0.99-1.5)         | 0.063    | 1.74 (0.93-3.26) | 0.081    |
| 16-17 years                                                                    | 1.94 (1.49-2.53) | <0.001   | 0.87 (0.61-1.24) | 0.435    | 1.88 (1.54-2.3)              | <0.001   | 1.54 (1.24-1.9)    | <0.001   | 1.41 (1.15-1.72)        | <0.001   | 1.82 (0.77-4.33) | 0.174    |
| <b>Socioeconomic status</b>                                                    |                  |          |                  |          |                              |          |                    |          |                         |          |                  |          |
| Average                                                                        | <b>Ref</b>       |          | <b>Ref</b>       |          | <b>Ref</b>                   |          | <b>Ref</b>         |          | <b>Ref</b>              |          | <b>Ref</b>       |          |
| Below average                                                                  | 1.20 (1.01-1.41) | 0.033    | 1.68 (1.36-2.07) | <0.001   | 1.38 (1.13-1.67)             | <0.001   | 1.54 (1.29-1.83)   | <0.001   | 1.37 (1.19-1.58)        | <0.001   | 1.01 (0.35-2.93) | 0.989    |
| <b>Close friends</b>                                                           |                  |          |                  |          |                              |          |                    |          |                         |          |                  |          |
| No                                                                             | 0.97 (0.6-1.57)  | 0.916    | 1.30 (0.93-1.81) | 0.125    | 1.20 (0.87-1.66)             | 0.254    | 1.07 (0.88-1.31)   | 0.504    | 0.98 (0.64-1.5)         | 0.918    | 0.86 (0.27-2.75) | 0.796    |
| Yes                                                                            | <b>Ref</b>       |          | <b>Ref</b>       |          | <b>Ref</b>                   |          | <b>Ref</b>         |          | <b>Ref</b>              |          | <b>Ref</b>       |          |
| <b>Peers supportive</b>                                                        |                  |          |                  |          |                              |          |                    |          |                         |          |                  |          |
| Never/rarely                                                                   | <b>Ref</b>       |          | <b>Ref</b>       |          | <b>Ref</b>                   |          | <b>Ref</b>         |          | <b>Ref</b>              |          | <b>Ref</b>       |          |
| Sometimes                                                                      | 0.67 (0.51-0.88) | 0.004    | 0.86 (0.62-1.18) | 0.346    | 0.95 (0.77-1.16)             | 0.605    | 1.00 (0.81-1.23)   | 0.967    | 0.93 (0.76-1.13)        | 0.440    | 1.45 (0.86-2.46) | 0.166    |
| Most of the times                                                              | 0.87 (0.62-1.22) | 0.427    | 0.98 (0.7-1.36)  | 0.884    | 1.05 (0.88-1.24)             | 0.611    | 1.12 (0.87-1.44)   | 0.384    | 1.03 (0.8-1.32)         | 0.840    | 0.99 (0.38-2.57) | 0.985    |
| Always                                                                         | 0.78 (0.6-1.01)  | 0.061    | 1.02 (0.65-1.61) | 0.932    | 1.13 (0.93-1.38)             | 0.217    | 0.97 (0.76-1.23)   | 0.776    | 1.12 (0.87-1.46)        | 0.377    | 0.73 (0.37-1.43) | 0.357    |
| <b>Parental understanding (Parents or guardians understood problem)</b>        |                  |          |                  |          |                              |          |                    |          |                         |          |                  |          |
| Never/rarely                                                                   | <b>Ref</b>       |          | <b>Ref</b>       |          | <b>Ref</b>                   |          | <b>Ref</b>         |          | <b>Ref</b>              |          | <b>Ref</b>       |          |
| Sometimes                                                                      | 0.55 (0.43-0.71) | <0.001   | 0.66 (0.46-0.94) | 0.020    | 0.99 (0.79-1.23)             | 0.898    | 0.77 (0.6-0.98)    | 0.034    | 0.85 (0.7-1.03)         | 0.093    | 0.79 (0.46-1.38) | 0.416    |
| Most of the times                                                              | 0.53 (0.38-0.74) | <0.001   | 0.94 (0.65-1.35) | 0.727    | 1.20 (0.93-1.55)             | 0.157    | 0.88 (0.71-1.09)   | 0.232    | 0.98 (0.78-1.23)        | 0.853    | 1.21 (0.57-2.6)  | 0.619    |
| Always                                                                         | 0.82 (0.63-1.07) | 0.140    | 1.19 (0.8-1.77)  | 0.399    | 0.91 (0.73-1.13)             | 0.386    | 1.04 (0.89-1.21)   | 0.631    | 0.93 (0.7-1.23)         | 0.594    | 0.57 (0.32-1)    | 0.050    |
| <b>Parental monitoring (Parents or guardians didn't know about free time )</b> |                  |          |                  |          |                              |          |                    |          |                         |          |                  |          |
| Never/rarely                                                                   | <b>Ref</b>       |          | <b>Ref</b>       |          | <b>Ref</b>                   |          | <b>Ref</b>         |          | <b>Ref</b>              |          | <b>Ref</b>       |          |
| Sometimes                                                                      | 1.00 (0.76-1.31) | 0.993    | 1.29 (0.89-1.85) | 0.174    | 0.96 (0.78-1.18)             | 0.712    | 0.65 (0.54-0.78)   | <0.001   | 0.86 (0.7-1.05)         | 0.135    | 0.89 (0.5-1.6)   | 0.700    |
| Most of the times                                                              | 0.99 (0.7-1.41)  | 0.976    | 1.02 (0.72-1.43) | 0.928    | 0.93 (0.76-1.13)             | 0.453    | 0.68 (0.58-0.81)   | <0.001   | 1.13 (0.92-1.38)        | 0.245    | 0.74 (0.31-1.73) | 0.483    |

|                                                                          |                  |        |                  |        |                  |        |                  |        |                  |        |                    |        |
|--------------------------------------------------------------------------|------------------|--------|------------------|--------|------------------|--------|------------------|--------|------------------|--------|--------------------|--------|
| Always                                                                   | 0.95 (0.69-1.31) | 0.743  | 1.28 (0.89-1.82) | 0.177  | 0.91 (0.72-1.14) | 0.417  | 0.69 (0.56-0.86) | 0.001  | 0.95 (0.74-1.21) | 0.665  | 0.62 (0.29-1.36)   | 0.234  |
| <b>Parental control (Parents went through things without permission)</b> |                  |        |                  |        |                  |        |                  |        |                  |        |                    |        |
| Never/rarely                                                             | <b>Ref</b>       |        | <b>Ref</b>         |        |
| Sometimes                                                                | 1.20 (0.92-1.57) | 0.185  | 1.30 (0.69-2.43) | 0.416  | 0.95 (0.74-1.21) | 0.667  | 1.10 (0.92-1.32) | 0.283  | 0.9 (0.73-1.09)  | 0.280  | NA                 | NA     |
| Most of the times                                                        | 1.40 (1-1.95)    | 0.047  | 1.86 (1.33-2.6)  | <0.001 | 1.64 (1.17-2.28) | 0.004  | 1.31 (1.09-1.56) | 0.003  | 1.93 (1.46-2.55) | <0.001 | NA                 | NA     |
| Always                                                                   | 1.11 (0.81-1.52) | 0.521  | 1.76 (1.13-2.72) | 0.012  | 1.51 (1.14-2)    | 0.004  | 1.53 (1.32-1.78) | <0.001 | 2.09 (1.48-2.95) | <0.001 | NA                 | NA     |
| <b>Peer conflict</b>                                                     |                  |        |                  |        |                  |        |                  |        |                  |        |                    |        |
| Yes                                                                      | 1.70 (1.33-2.17) | <0.001 | 1.22 (0.92-1.63) | 0.168  | 1.39 (1.19-1.63) | <0.001 | 1.47 (1.26-1.73) | <0.001 | 1.36 (1.18-1.58) | <0.001 | 1.24 (0.67-2.29)   | 0.496  |
| No                                                                       | <b>Ref</b>       |        | <b>Ref</b>         |        |
| <b>Peer victimization</b>                                                |                  |        |                  |        |                  |        |                  |        |                  |        |                    |        |
| Yes                                                                      | 1.26 (1.01-1.57) | 0.044  | 1.47 (1.11-1.95) | 0.007  | 1.2 (1-1.44)     | 0.044  | 1.50 (1.29-1.75) | <0.001 | 1.01 (0.85-1.2)  | 0.907  | NA                 | NA     |
| No                                                                       | <b>Ref</b>       |        | NA                 | NA     |
| <b>Peer isolation</b>                                                    |                  |        |                  |        |                  |        |                  |        |                  |        |                    |        |
| Yes                                                                      | 2.05 (1.62-2.59) | <0.001 | 1.84 (1.5-2.27)  | <0.001 | 1.48 (1.2-1.83)  | <0.001 | 1.66 (1.42-1.93) | <0.001 | 1.35 (1.12-1.62) | 0.002  | 2.15 (1.25-3.72)   | 0.006  |
| No                                                                       | <b>Ref</b>       |        | <b>Ref</b>         |        |
| <b>loneliness</b>                                                        |                  |        |                  |        |                  |        |                  |        |                  |        |                    |        |
| Yes                                                                      | 6.60 (5.28-8.25) | <0.001 | 4.13 (2.99-5.69) | <0.001 | 4.4 (3.72-5.19)  | <0.001 | 5.22 (4.6-5.93)  | <0.001 | 5.31 (4.45-6.34) | <0.001 | 12.38 (6.92-22.17) | <0.001 |
| No                                                                       | <b>Ref</b>       |        | <b>Ref</b>         |        |

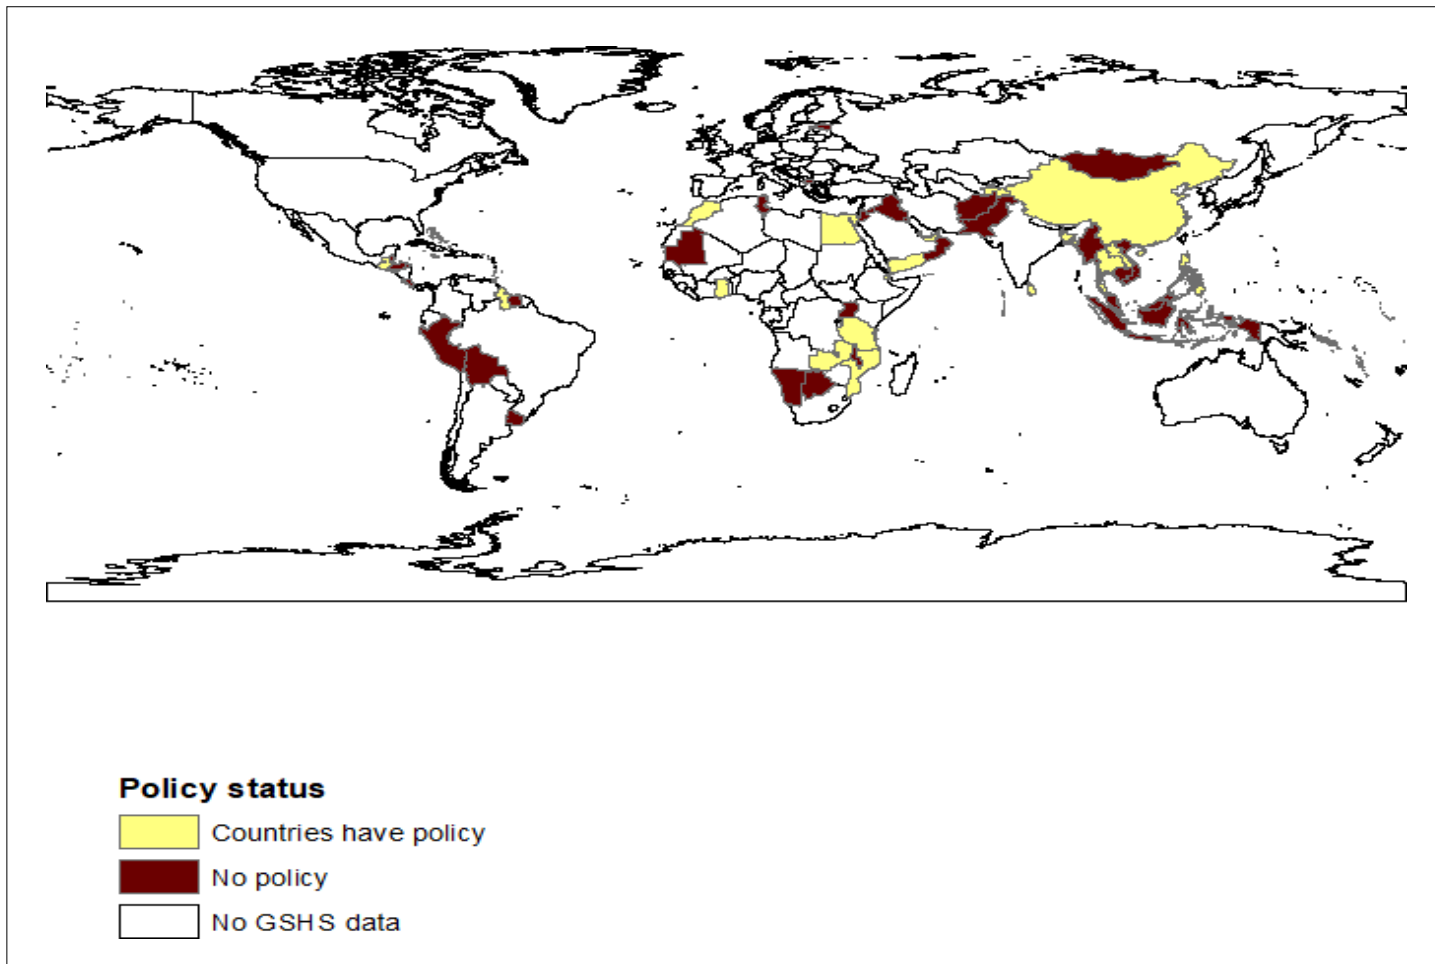

**Supplementary figure-1: Country status policy formulation to adolescent mental health**
